# Supplementary material for: Effectiveness and Safety of Oral Chinese Patent Medicines Combined with Chemotherapy for Gastric Cancer: A Bayesian Network Meta-Analysis
Source: Evid Based Complement Alternat Med. 2020 Aug 26;2020:8016531. doi: 10.1155/2020/8016531 (PMC7471790; doi:10.1155/2020/8016531)
Supplement: Supplementary Materials — Table S1: PRISMA NMA Checklist. Table S2: details of the search strategy for PubMed. [file 8016531.f1.zip]

Archive with 2 entries (2 files):
- Table S1:PRISMA NMA Checklist.docx
- Table S2:Details of the search strategy for PubMed.docx
